# Supplementary material for: Tailoring high-temperature stability and electrical conductivity of high entropy lanthanum manganite for solid oxide fuel cell cathodes
Source: Royal Society of Chemistry journal article supplement (doi:10.1039/d1ta07275g), 2021-10-20
Supplement: d1ta07275g1.pdf [file d1ta07275g1.pdf]

## Supporting Information

### Tailoring high-temperature stability and electrical conductivity of high entropy lanthanum manganite for solid oxide fuel cell cathodes

Yinchun Shi <sup>a</sup>, Na Ni <sup>\*abc</sup>, Qi Ding <sup>d</sup> and Xiaofeng Zhao <sup>a</sup>

<sup>a</sup>*School of Materials Science and Engineering, Shanghai Jiao Tong University, Shanghai 200240, China*

<sup>b</sup>*Key Lab of Education Ministry for Power Machinery and Engineering, School of Mechanical Engineering, Shanghai Jiao Tong University, Shanghai 200240, China*

<sup>c</sup>*Gas Turbine Research Institute, School of Mechanical Engineering, Shanghai Jiao Tong University, Shanghai 200240, China. E-mail: na.ni@sjtu.edu.cn*

<sup>d</sup>*School of Mechanical Engineering, Shanghai Jiao Tong University, Shanghai 200240, China.*

**Table S1** Average particle/ grain sizes and corresponding calcination/ sintering parameters of single-phase HEALMO and LSM82 powders and pellets. The calcination temperature was chosen as the minimum temperature at which a single-phase structure can be obtained after the precursor was calcinated for 2 h.

| Composition | Powder                     |                       | Pellet                               |                     |
|-------------|----------------------------|-----------------------|--------------------------------------|---------------------|
|             | Average particle size (nm) | Calcination parameter | Average grain size ( $\mu\text{m}$ ) | Sintering parameter |
| HEALMO-1    | 520                        | 1200°C for 2 h        | 3.85                                 | 1400°C for 10 h     |
| HEALMO-2    | 360                        | 1200 C for 2 h        | 4.28                                 | 1400°C for 10 h     |
| HEALMO-3    | 220                        | 1100 C for 2 h        | 1.75                                 | 1300°C for 10 h     |
| LSM82       | 660                        | Unknown               | 10.74                                | 1400°C for 5 h      |

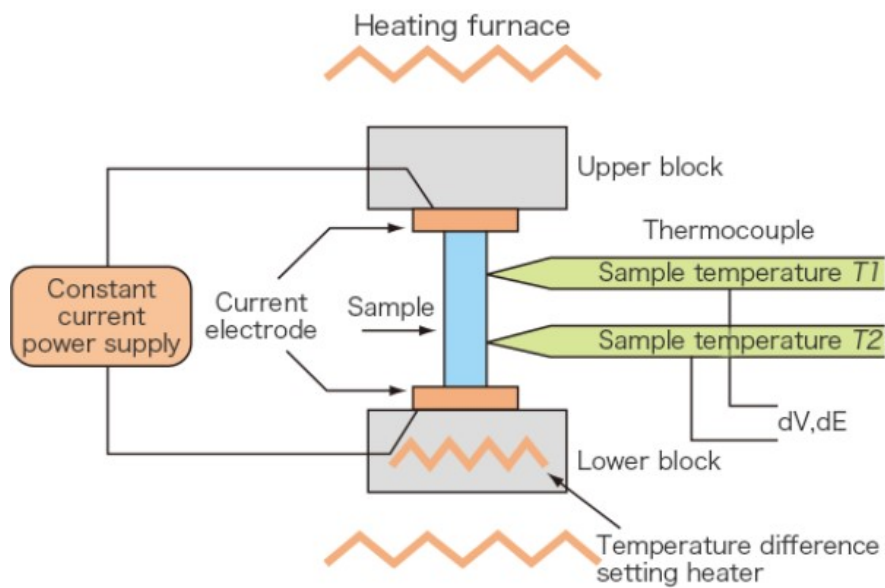

**Fig. S1** Schematic diagram of electrical conductivity measurement via Seebeck coefficient/ electrical resistance measuring system, in which the current electrodes and thermocouples are made of platinum-rhodium alloy. The two parallel thermocouples are used to measure the voltage drop, and the corresponding parallel distance is 6 mm.

ADVANCE RIKO, Inc., <https://advance-riko.com/en/products/zem-3/>, (accessed September 2021).

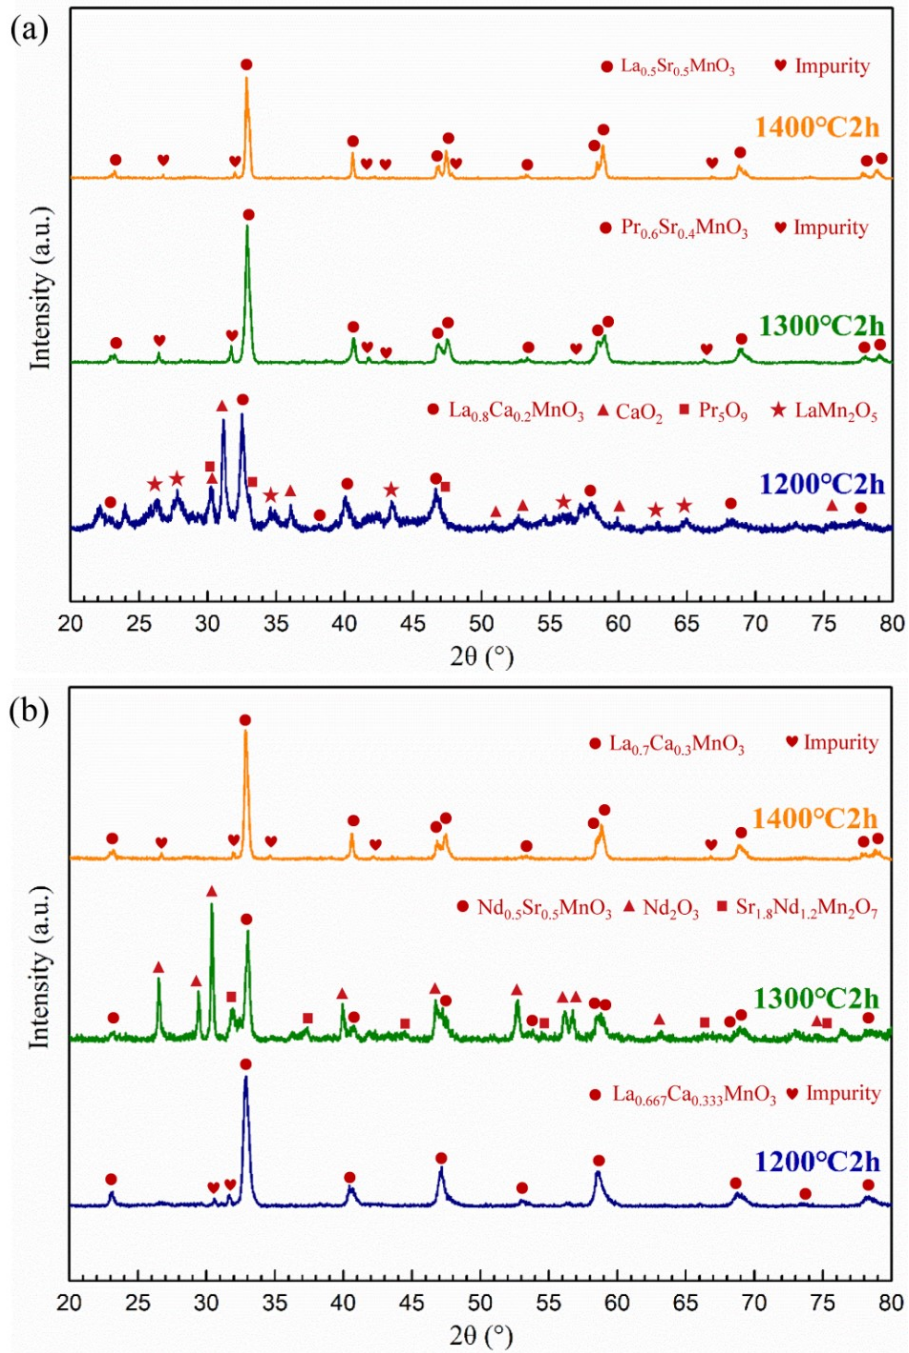

Fig. S2 XRD patterns of non-single-phase HEALMOs:

(a) HEALMO-4 and (b) HEALMO-5.

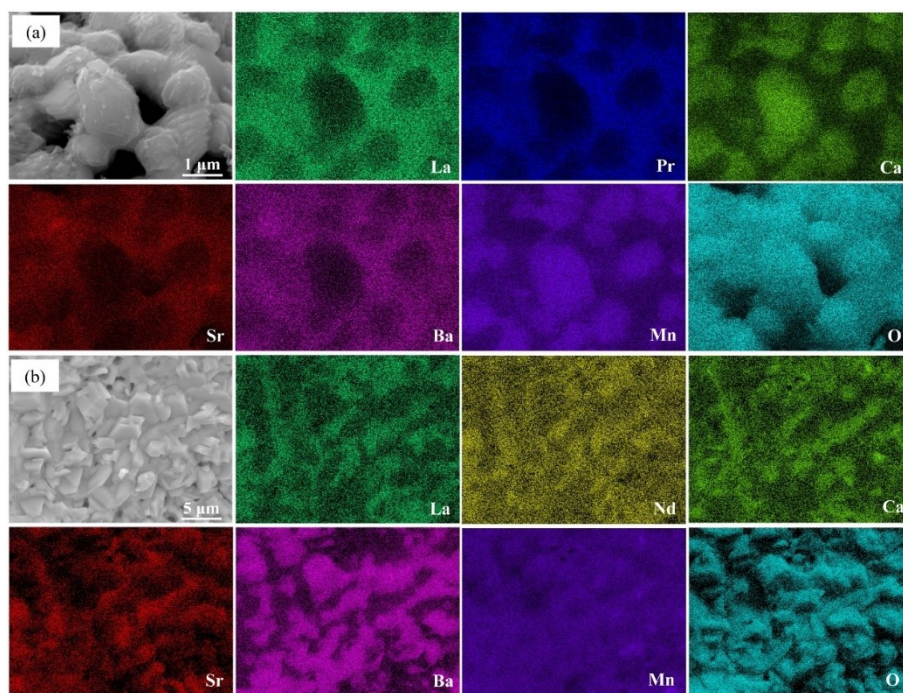

**Fig. S3** Elemental distribution in non-single-phase HEALMOs:

(a) HEALMO-4 and (b) HEALMO-5.

**Table S2** Average relative acidity of A site oxides in HEALMOs, and relative acidity of oxides related to HEALMOs.

| Composition                    | Relative acidity | Composition                    | Relative acidity |
|--------------------------------|------------------|--------------------------------|------------------|
| HEALMO-1                       | 1.252            | Sm <sub>2</sub> O <sub>3</sub> | 1.274            |
| HEALMO-2                       | 0.995            | Nd <sub>2</sub> O <sub>3</sub> | 1.139            |
| HEALMO-3                       | 1.069            | CaO                            | 1.099            |
| HEALMO-4                       | 0.987            | Pr <sub>2</sub> O <sub>3</sub> | 1.064            |
| HEALMO-5                       | 1.002            | SrO                            | 0.978            |
| Y <sub>2</sub> O <sub>3</sub>  | 1.591            | BaO                            | 0.938            |
| Gd <sub>2</sub> O <sub>3</sub> | 1.402            | La <sub>2</sub> O <sub>3</sub> | 0.855            |

**Table S3** Oxidation state, coordination number, ionic radii of A site cations, and prototype structure of the corresponding manganite associated with HEALMO-4 and HEALMO-5.

| A site cation    | Coordination number <sup>1,2</sup> | Ionic radii ( $\text{\AA}$ ) <sup>1,2</sup> |
|------------------|------------------------------------|---------------------------------------------|
| La <sup>3+</sup> | XII                                | 1.36                                        |
| Pr <sup>3+</sup> | XII                                | 1.32                                        |
| Nd <sup>3+</sup> | XII                                | 1.27                                        |
| Ca <sup>2+</sup> | XII                                | 1.34                                        |
| Sr <sup>2+</sup> | XII                                | 1.44                                        |
| Ba <sup>2+</sup> | XII                                | 1.61                                        |

**Table S4** Crystal structure, space group, Goldschmidt's tolerance factor and cation size difference of conventional and high entropy perovskite oxides. To facilitate the comparison, Goldschmidt's tolerance factor ( $t$ ) and cation size difference ( $\delta$ ) of reported materials from the literature were re-calculated according to Equation (3) and (4) in the manuscript using the ion radius values in Table S5.

| Composition                                            | Crystal structure | SG          | Goldschmidt's tolerance factor ( $t$ ) | Cation size difference ( $\delta$ ) | Reference |
|--------------------------------------------------------|-------------------|-------------|----------------------------------------|-------------------------------------|-----------|
| (La <sub>0.9</sub> Ca <sub>0.1</sub> )MnO <sub>3</sub> | Orthorhombic      | -           | 0.969                                  | 0.44%                               | 3         |
| (La <sub>0.6</sub> Ca <sub>0.4</sub> )MnO <sub>3</sub> | Orthorhombic      | <i>Pbnm</i> | 0.967                                  | 0.72%                               | 4         |
| (La <sub>0.9</sub> Sr <sub>0.1</sub> )MnO <sub>3</sub> | Orthorhombic      | <i>Pbnm</i> | 0.972                                  | 1.75%                               | 5         |
| (La <sub>0.9</sub> Ba <sub>0.1</sub> )MnO <sub>3</sub> | Orthorhombic      | <i>Pnma</i> | 0.978                                  | 5.42%                               | 6         |
| (La <sub>0.8</sub> Ca <sub>0.2</sub> )MnO <sub>3</sub> | Orthorhombic      | <i>Pnma</i> | 0.968                                  | 0.59%                               | 7         |
| (La <sub>0.7</sub> Ca <sub>0.3</sub> )MnO <sub>3</sub> | Orthorhombic      | <i>Pnma</i> | 0.967                                  | 0.68%                               |           |
| (La <sub>0.6</sub> Sr <sub>0.4</sub> )MnO <sub>3</sub> | Orthorhombic      | -           | 0.981                                  | 2.82%                               | 8         |
| (La <sub>0.5</sub> Sr <sub>0.5</sub> )MnO <sub>3</sub> | Orthorhombic      | -           | 0.984                                  | 2.86%                               |           |
| (Pr <sub>0.9</sub> Sr <sub>0.1</sub> )MnO <sub>3</sub> | Orthorhombic      | -           | 0.960                                  | 2.70%                               |           |
| (Pr <sub>0.8</sub> Sr <sub>0.2</sub> )MnO <sub>3</sub> | Orthorhombic      | -           | 0.964                                  | 3.57%                               |           |
| (Pr <sub>0.7</sub> Sr <sub>0.3</sub> )MnO <sub>3</sub> | Orthorhombic      | -           | 0.968                                  | 4.06%                               |           |
| (Pr <sub>0.6</sub> Sr <sub>0.4</sub> )MnO <sub>3</sub> | Orthorhombic      | -           | 0.973                                  | 4.30%                               |           |
| (Pr <sub>0.5</sub> Sr <sub>0.5</sub> )MnO <sub>3</sub> | Orthorhombic      | -           | 0.977                                  | 4.35%                               |           |
| (Nd <sub>0.9</sub> Sr <sub>0.1</sub> )MnO <sub>3</sub> | Orthorhombic      | -           | 0.944                                  | 3.96%                               |           |
| (Nd <sub>0.8</sub> Sr <sub>0.2</sub> )MnO <sub>3</sub> | Orthorhombic      | -           | 0.950                                  | 5.21%                               |           |
| (Nd <sub>0.7</sub> Sr <sub>0.3</sub> )MnO <sub>3</sub> | Orthorhombic      | -           | 0.956                                  | 5.90%                               |           |
| (Nd <sub>0.6</sub> Sr <sub>0.4</sub> )MnO <sub>3</sub> | Orthorhombic      | -           | 0.962                                  | 6.22%                               |           |
| (Nd <sub>0.5</sub> Sr <sub>0.5</sub> )MnO <sub>3</sub> | Orthorhombic      | -           | 0.968                                  | 6.27%                               |           |
| (Sm <sub>0.9</sub> Sr <sub>0.1</sub> )MnO <sub>3</sub> | Orthorhombic      | -           | 0.935                                  | 4.76%                               |           |
| (Sm <sub>0.8</sub> Sr <sub>0.2</sub> )MnO <sub>3</sub> | Orthorhombic      | -           | 0.942                                  | 6.25%                               |           |
| (Sm <sub>0.7</sub> Sr <sub>0.3</sub> )MnO <sub>3</sub> | Orthorhombic      | -           | 0.948                                  | 7.05%                               |           |
| (Sm <sub>0.6</sub> Sr <sub>0.4</sub> )MnO <sub>3</sub> | Orthorhombic      | -           | 0.955                                  | 7.42%                               |           |
| (Sm <sub>0.5</sub> Sr <sub>0.5</sub> )MnO <sub>3</sub> | Orthorhombic      | -           | 0.963                                  | 7.46%                               |           |
| (Gd <sub>0.9</sub> Sr <sub>0.1</sub> )MnO <sub>3</sub> | Orthorhombic      | -           | 0.944                                  | 3.96%                               |           |
| (Gd <sub>0.8</sub> Sr <sub>0.2</sub> )MnO <sub>3</sub> | Orthorhombic      | -           | 0.950                                  | 5.21%                               |           |
| (Gd <sub>0.7</sub> Sr <sub>0.3</sub> )MnO <sub>3</sub> | Orthorhombic      | -           | 0.956                                  | 5.90%                               |           |
| (Gd <sub>0.6</sub> Sr <sub>0.4</sub> )MnO <sub>3</sub> | Orthorhombic      | -           | 0.962                                  | 6.22%                               |           |
| (Gd <sub>0.5</sub> Sr <sub>0.5</sub> )MnO <sub>3</sub> | Orthorhombic      | -           | 0.968                                  | 6.27%                               |           |
| (Gd <sub>0.5</sub> Sr <sub>0.5</sub> )CoO <sub>3</sub> | Orthorhombic      | <i>Pnma</i> | 0.985                                  | 6.27%                               | 9         |
| (Nd <sub>0.5</sub> Ba <sub>0.5</sub> )CoO <sub>3</sub> | Orthorhombic      | <i>Pmmm</i> | 1.016                                  | 11.81%                              |           |
| (Gd <sub>0.5</sub> Ba <sub>0.5</sub> )CoO <sub>3</sub> | Orthorhombic      | <i>Pmmm</i> | 1.016                                  | 11.81%                              |           |
| (La <sub>0.5</sub> Sr <sub>0.5</sub> )CoO <sub>3</sub> | Rhombohedral      | $R\bar{3}c$ | 1.001                                  | 2.86%                               |           |
| (Pr <sub>0.5</sub> Sr <sub>0.5</sub> )CoO <sub>3</sub> | Rhombohedral      | $R\bar{3}c$ | 0.994                                  | 4.35%                               |           |
| (Nd <sub>0.5</sub> Sr <sub>0.5</sub> )CoO <sub>3</sub> | Rhombohedral      | $R\bar{3}c$ | 0.985                                  | 6.27%                               |           |
| (La <sub>0.5</sub> Ba <sub>0.5</sub> )CoO <sub>3</sub> | Rhombohedral      | $R\bar{3}c$ | 1.032                                  | 8.42%                               |           |
| (La <sub>0.8</sub> Ba <sub>0.2</sub> )MnO <sub>3</sub> | Rhombohedral      | $R\bar{3}c$ | 0.987                                  | 7.09%                               |           |



|                                                                                                             |              |              |       |        |    |
|-------------------------------------------------------------------------------------------------------------|--------------|--------------|-------|--------|----|
| $(\text{La}_{0.7}\text{Ba}_{0.3})\text{MnO}_3$                                                              | Rhombohedral | $R\bar{3}C$  | 0.996 | 7.98%  |    |
| $(\text{La}_{0.7}\text{Sr}_{0.3})\text{MnO}_3$                                                              | Rhombohedral | $R\bar{3}C$  | 0.978 | 2.65%  | 7  |
| $(\text{Sr}_{0.9}\text{Ho}_{0.1})\text{CoO}_3$                                                              | Cubic        | $Pm\bar{3}m$ | 1.008 | 4.44%  | 10 |
| $(\text{Sm}_{0.4}\text{Sr}_{0.6})\text{CoO}_3$                                                              | Cubic        | -            | 0.987 | 7.20%  |    |
| $(\text{Sm}_{0.3}\text{Sr}_{0.7})\text{CoO}_3$                                                              | Cubic        | -            | 0.994 | 6.64%  |    |
| $(\text{Sm}_{0.2}\text{Sr}_{0.8})\text{CoO}_3$                                                              | Cubic        | -            | 1.001 | 5.71%  |    |
| $(\text{Sm}_{0.1}\text{Sr}_{0.9})\text{CoO}_3$                                                              | Cubic        | -            | 1.008 | 4.23%  | 11 |
| $(\text{Dy}_{0.3}\text{Sr}_{0.7})\text{CoO}_3$                                                              | Cubic        | -            | 0.994 | 6.64%  |    |
| $(\text{Dy}_{0.2}\text{Sr}_{0.8})\text{CoO}_3$                                                              | Cubic        | -            | 1.001 | 5.71%  |    |
| $(\text{Dy}_{0.1}\text{Sr}_{0.9})\text{CoO}_3$                                                              | Cubic        | -            | 1.008 | 4.23%  |    |
| $(\text{La}_{0.2}\text{Nd}_{0.2}\text{Sm}_{0.2}\text{Y}_{0.2}\text{Gd}_{0.2})\text{CoO}_3$                  | Orthorhombic | $Pbnm$       | 0.945 | 7.49%  |    |
| $(\text{La}_{0.2}\text{Nd}_{0.2}\text{Sm}_{0.2}\text{Y}_{0.2}\text{Gd}_{0.2})\text{CrO}_3$                  | Orthorhombic | $Pbnm$       | 0.927 | 7.49%  |    |
| $(\text{La}_{0.2}\text{Nd}_{0.2}\text{Sm}_{0.2}\text{Y}_{0.2}\text{Gd}_{0.2})\text{FeO}_3$                  | Orthorhombic | $Pbnm$       | 0.936 | 7.49%  |    |
| $\text{La}(\text{Co}_{0.2}\text{Cr}_{0.2}\text{Fe}_{0.2}\text{Mn}_{0.2}\text{Ni}_{0.2})\text{O}_3$          | Orthorhombic | $Pbnm$       | 0.978 | 2.63%  | 12 |
| $\text{Gd}(\text{Co}_{0.2}\text{Cr}_{0.2}\text{Fe}_{0.2}\text{Mn}_{0.2}\text{Ni}_{0.2})\text{O}_3$          | Orthorhombic | $Pbnm$       | 0.946 | 2.63%  |    |
| $\text{Sm}(\text{Co}_{0.2}\text{Cr}_{0.2}\text{Fe}_{0.2}\text{Mn}_{0.2}\text{Ni}_{0.2})\text{O}_3$          | Orthorhombic | $Pbnm$       | 0.935 | 2.63%  |    |
| $\text{Nd}(\text{Co}_{0.2}\text{Cr}_{0.2}\text{Fe}_{0.2}\text{Mn}_{0.2}\text{Ni}_{0.2})\text{O}_3$          | Orthorhombic | $Pbnm$       | 0.946 | 2.63%  |    |
| $\text{Y}(\text{Co}_{0.2}\text{Cr}_{0.2}\text{Fe}_{0.2}\text{Mn}_{0.2}\text{Ni}_{0.2})\text{O}_3$           | Orthorhombic | $Pbnm$       | 0.880 | 2.63%  |    |
| $(\text{La}_{0.2}\text{Pr}_{0.2}\text{Nd}_{0.2}\text{Sm}_{0.2}\text{Sr}_{0.2})\text{MnO}_{3-\delta}$        | Orthorhombic | $Pnma$       | 0.958 | 5.30%  | 13 |
| $\text{La}(\text{Mn}_{0.2}\text{Fe}_{0.2}\text{Co}_{0.2}\text{Ni}_{0.2}\text{Cu}_{0.2})\text{O}_{3-\delta}$ | Hexagonal    | $R\bar{3}cH$ | 0.966 | 9.15%  | 14 |
| $\text{Ba}(\text{Zr}_{0.2}\text{Ti}_{0.2}\text{Sn}_{0.2}\text{Hf}_{0.2}\text{Y}_{0.2})\text{O}_3$           | Cubic        | $Pm\bar{3}m$ | 1.001 | 13.30% |    |
| $\text{Ba}(\text{Zr}_{0.2}\text{Ti}_{0.2}\text{Sn}_{0.2}\text{Hf}_{0.2}\text{Nb}_{0.2})\text{O}_3$          | Cubic        | $Pm\bar{3}m$ | 1.026 | 6.50%  | 15 |
| $\text{Ba}(\text{Zr}_{0.2}\text{Ti}_{0.2}\text{Sn}_{0.2}\text{Hf}_{0.2}\text{Ta}_{0.2})\text{O}_3$          | Cubic        | $Pm\bar{3}m$ | 1.026 | 6.50%  |    |
| $\text{Sr}(\text{Zr}_{0.2}\text{Sn}_{0.2}\text{Ti}_{0.2}\text{Hf}_{0.2}\text{Mn}_{0.2})\text{O}_3$          | Cubic        | $Pm\bar{3}m$ | 0.972 | 7.34%  |    |
| $\text{Sr}(\text{Zr}_{0.2}\text{Sn}_{0.2}\text{Ti}_{0.2}\text{Hf}_{0.2}\text{Nb}_{0.2})\text{O}_3$          | Cubic        | $Pm\bar{3}m$ | 0.968 | 6.50%  |    |
| $\text{Ba}(\text{Zr}_{0.2}\text{Sn}_{0.2}\text{Ti}_{0.2}\text{Hf}_{0.2}\text{Ce}_{0.2})\text{O}_3$          | Cubic        | $Pm\bar{3}m$ | 1.004 | 11.92% | 16 |
| $\text{Ba}(\text{Zr}_{0.2}\text{Sn}_{0.2}\text{Ti}_{0.2}\text{Hf}_{0.2}\text{Y}_{0.2})\text{O}_{3-x}$       | Cubic        | $Pm\bar{3}m$ | 1.001 | 13.30% |    |
| $\text{Ba}(\text{Zr}_{0.2}\text{Sn}_{0.2}\text{Ti}_{0.2}\text{Hf}_{0.2}\text{Nb}_{0.2})\text{O}_3$          | Cubic        | $Pm\bar{3}m$ | 1.026 | 6.50%  |    |

**Table S5** Ion radius values used to re-calculate Goldschmidt's tolerance factor ( $t$ ) and cation size difference ( $\delta$ ) of reported materials are listed in Table S2. The "LS" in Table means "low spin", and "HS" means "high spin".

| Cation           | Coordination number <sup>1,2</sup> | Ionic radii ( $\text{Å}$ ) <sup>1,2</sup> |
|------------------|------------------------------------|-------------------------------------------|
| La <sup>3+</sup> | XII                                | 1.36                                      |
| Nd <sup>3+</sup> | XII                                | 1.27                                      |
| Sm <sup>3+</sup> | XII                                | 1.24                                      |
| Gd <sup>3+</sup> | XII                                | 1.27                                      |
| Pr <sup>3+</sup> | XII                                | 1.32                                      |
| Ca <sup>2+</sup> | XII                                | 1.34                                      |
| Sr <sup>2+</sup> | XII                                | 1.44                                      |
| Ba <sup>2+</sup> | XII                                | 1.61                                      |
| Ho <sup>3+</sup> | XII                                | 1.23                                      |
| Dy <sup>3+</sup> | XII                                | 1.24                                      |
| Y <sup>3+</sup>  | IX                                 | 1.075                                     |
| Y <sup>3+</sup>  | VI                                 | 0.90                                      |
| Ti <sup>4+</sup> | VI                                 | 0.605                                     |
| Zr <sup>4+</sup> | VI                                 | 0.72                                      |
| Sn <sup>4+</sup> | VI                                 | 0.69                                      |
| Hf <sup>4+</sup> | VI                                 | 0.71                                      |
| Nb <sup>5+</sup> | VI                                 | 0.64                                      |
| Ta <sup>5+</sup> | VI                                 | 0.64                                      |
| Ce <sup>4+</sup> | VI                                 | 0.87                                      |
| Cr <sup>3+</sup> | VI                                 | 0.615                                     |
| Fe <sup>3+</sup> | VI                                 | 0.55 <sup>LS</sup> , 0.645 <sup>HS</sup>  |
| Co <sup>3+</sup> | VI                                 | 0.545 <sup>LS</sup> , 0.61 <sup>HS</sup>  |
| Ni <sup>3+</sup> | VI                                 | 0.56 <sup>LS</sup> , 0.60 <sup>HS</sup>   |
| Mn <sup>3+</sup> | VI                                 | 0.58 <sup>LS</sup> , 0.645 <sup>HS</sup>  |
| O <sup>2-</sup>  | VI                                 | 1.40                                      |

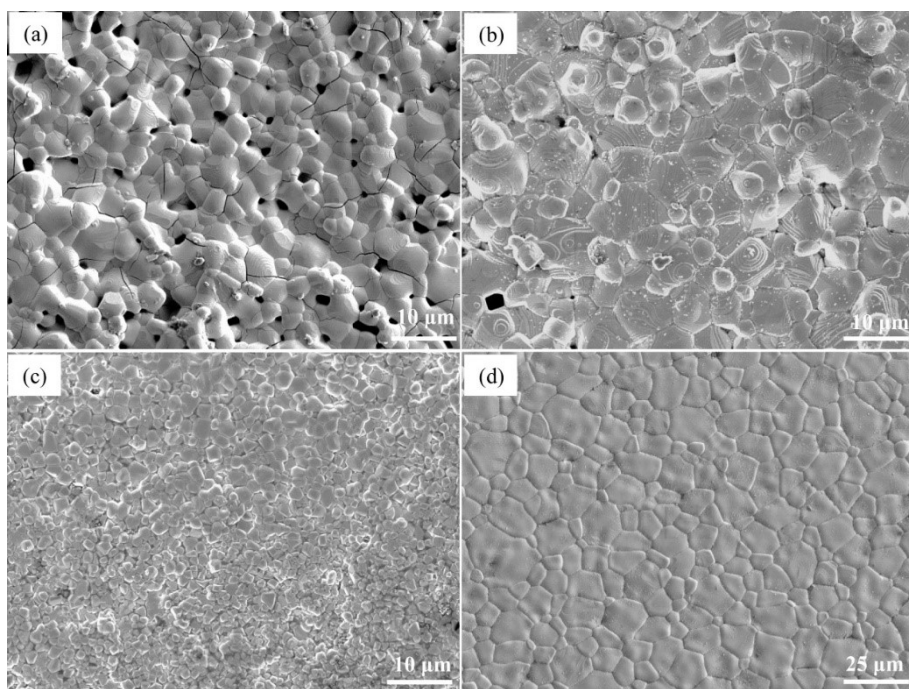

**Fig. S4** Morphology of sintered pellets of HEALMOs and LSM82:

(a) HEALMO-1, (b) HEALMO-2, (c) HEALMO-3 and (d) LSM82.

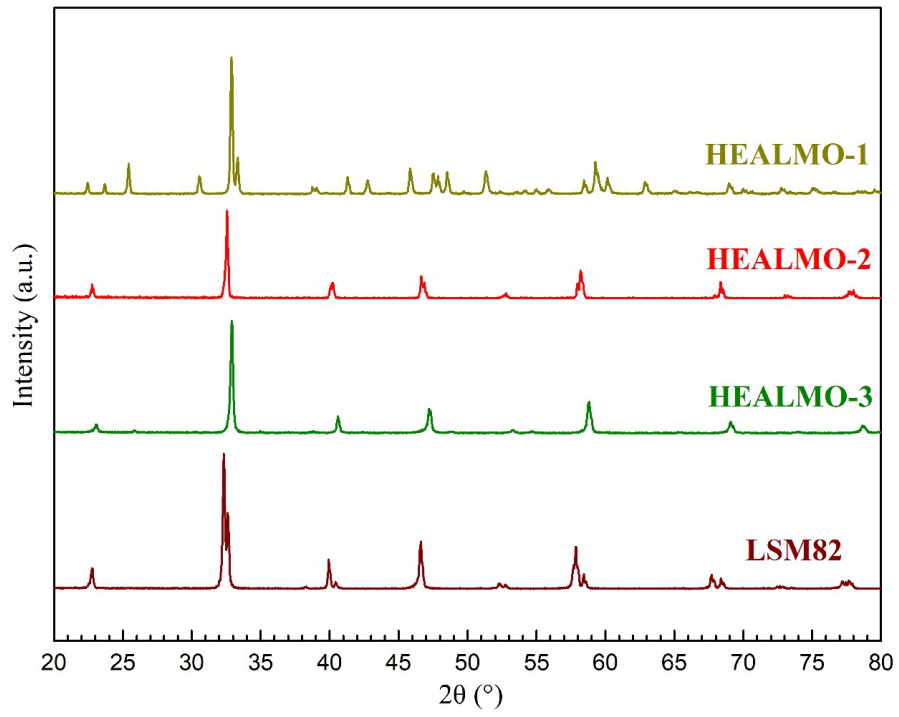

**Fig. S5** XRD patterns of HEALMOs and LSM82 rectangle bars after electrical conductivity and Seebeck coefficient measurement.

## References

- 1 R. D. Shannon, *Acta Crystallogr., Sect. A*, 1976, DOI: 10.1107/S0567739476001551.
- 2 Y.-Q. Jia, *J. Solid State Chem.*, 1991, **95**, 184-187.
- 3 T. Hashimoto, N. Ishizawa, N. Mizutani and M. Kato, *J. Mater. Sci.*, 1988, **23**, 1102–1105.
- 4 R.-S. Liu, C.-H. Shen and S.-F. Hu, *Int. J. Inorg. Mater.*, 2001, **3**, 1063–1072.
- 5 S. Xu, Y. Moritomo, K. Ohoyama and A. Nakamura, *J. Phys. Soc. Jpn.*, 2003, **72**, 709–712.
- 6 V. A. Cherepanov, E. A. Filonova, V. I. Voronin and I. F. Berger, *J. Solid State Chem.*, 2000, **153**, 205–211.
- 7 S. J. Hibble, S. P. Cooper, A. C. Hannon, I. D. Fawcett and M. Greenblatt, *J. Phys. Condens. Matter*, 1999, **11**, 9221–9238.
- 8 Y. Sakaki, Y. Takeda, A. Kato, N. Imanishi, O. Yamamoto, M. Hattori, M. Iio and Y. Esaki, *Solid State Ionics*, 1999, **118**, 187–194.
- 9 P. V. Vanitha, A. Arulraj, P. N. Santhosh and C. N. R. Rao, *Chem. Mater.*, 2000, **12**, 1666–1670.
- 10 T. Liu, L. Li and J.-K. Yu, *Ionics*, 2015, **22**, 853–858.
- 11 H.-Y. Tu, Y. Takeda, N. Imanishi and O. Yamamoto, *Solid State Ionics*, 1997, **100**, 283–288.
- 12 A. Sarkar, R. Djenadic, D. Wang, C. Hein, R. Kautenburger, O. Clemens and H. Hahn, *J. Eur. Ceram. Soc.*, 2018, **38**, 2318–2327.
- 13 Y. Yang, H. Bao, H. Ni, X. Ou, S. Wang, B. Lin, P. Feng and Y. Ling, *J. Power Sources*, 2021, DOI: 10.1016/j.jpowsour.2020.228959.
- 14 X. Han, Y. Yang, Y. Fan, H. Ni, Y. Guo, Y. Chen, X. Ou and Y. Ling, *Ceram. Int.*, 2021, DOI: 10.1016/j.ceramint.2021.03.052.
- 15 S. Zhou, Y. Pu, Q. Zhang, R. Shi, X. Guo, W. Wang, J. Ji, T. Wei and T. Ouyang, *Ceram. Int.*, 2020, **46**, 7430–7437.
- 16 S. Jiang, T. Hu, J. Gild, N. Zhou, J. Nie, M. Qin, T. Harrington, K. Vecchio and J. Luo, *Scr. Mater.*, 2018, **142**, 116–120.
